# Supplementary figures and images for: Degradation and Detoxification of Chlorophenols with Different Structure by LAC-4 Laccase Purified from White-Rot Fungus Ganoderma lucidum
Source: MDPI journal article supplement (doi:10.3390/ijerph19138150), 2022-07-02

**A** Fig.S2

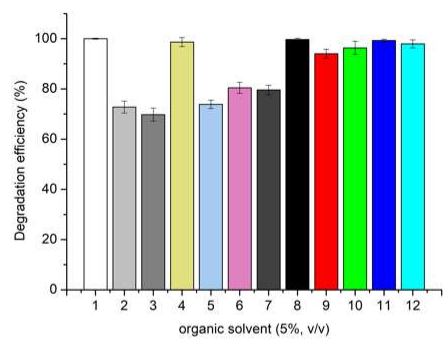

**B**

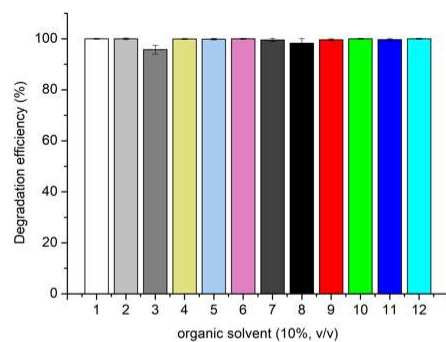

**C**

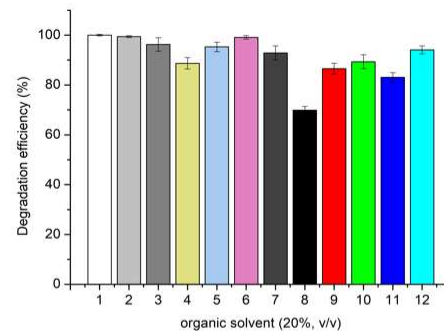

**D**

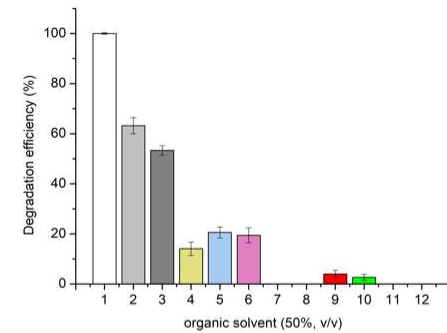

**E**

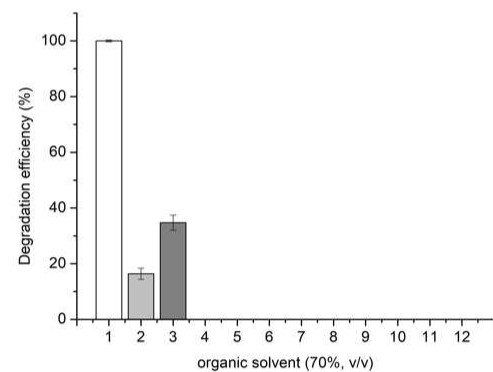

Supplement: s1 [file s1]

**A** Fig.S1

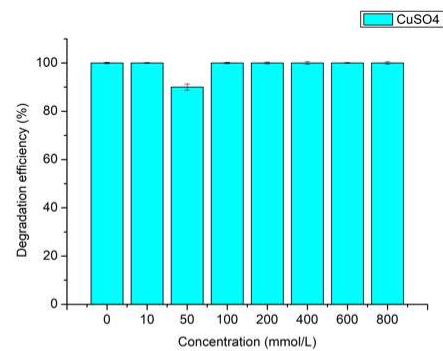

**B**

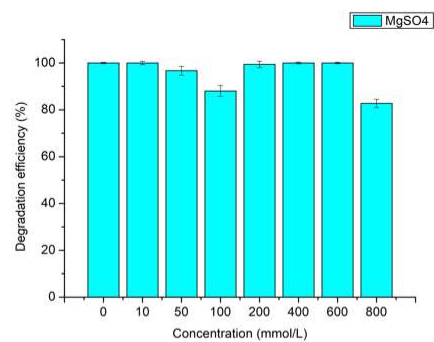

**C**

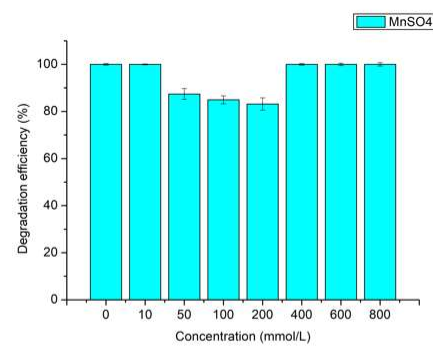

**D**

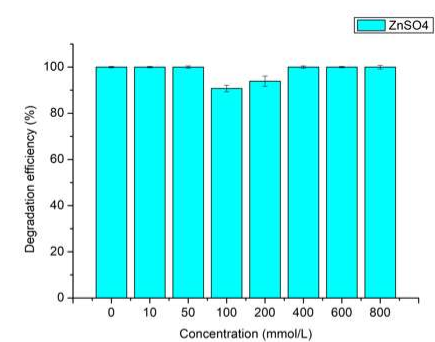

**E**

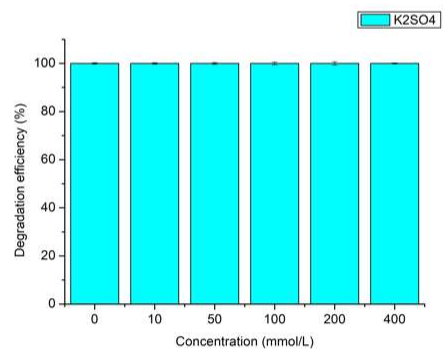

**F**

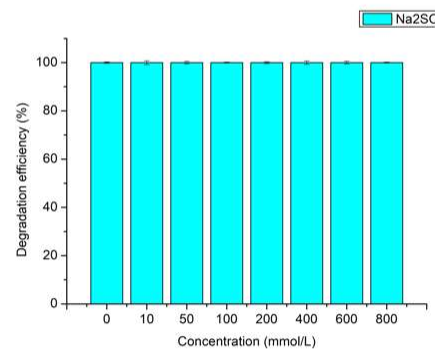

**G**

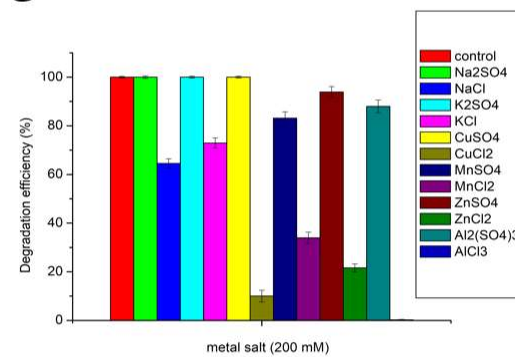

Supplement: s1 [file s1]

Fig.S4

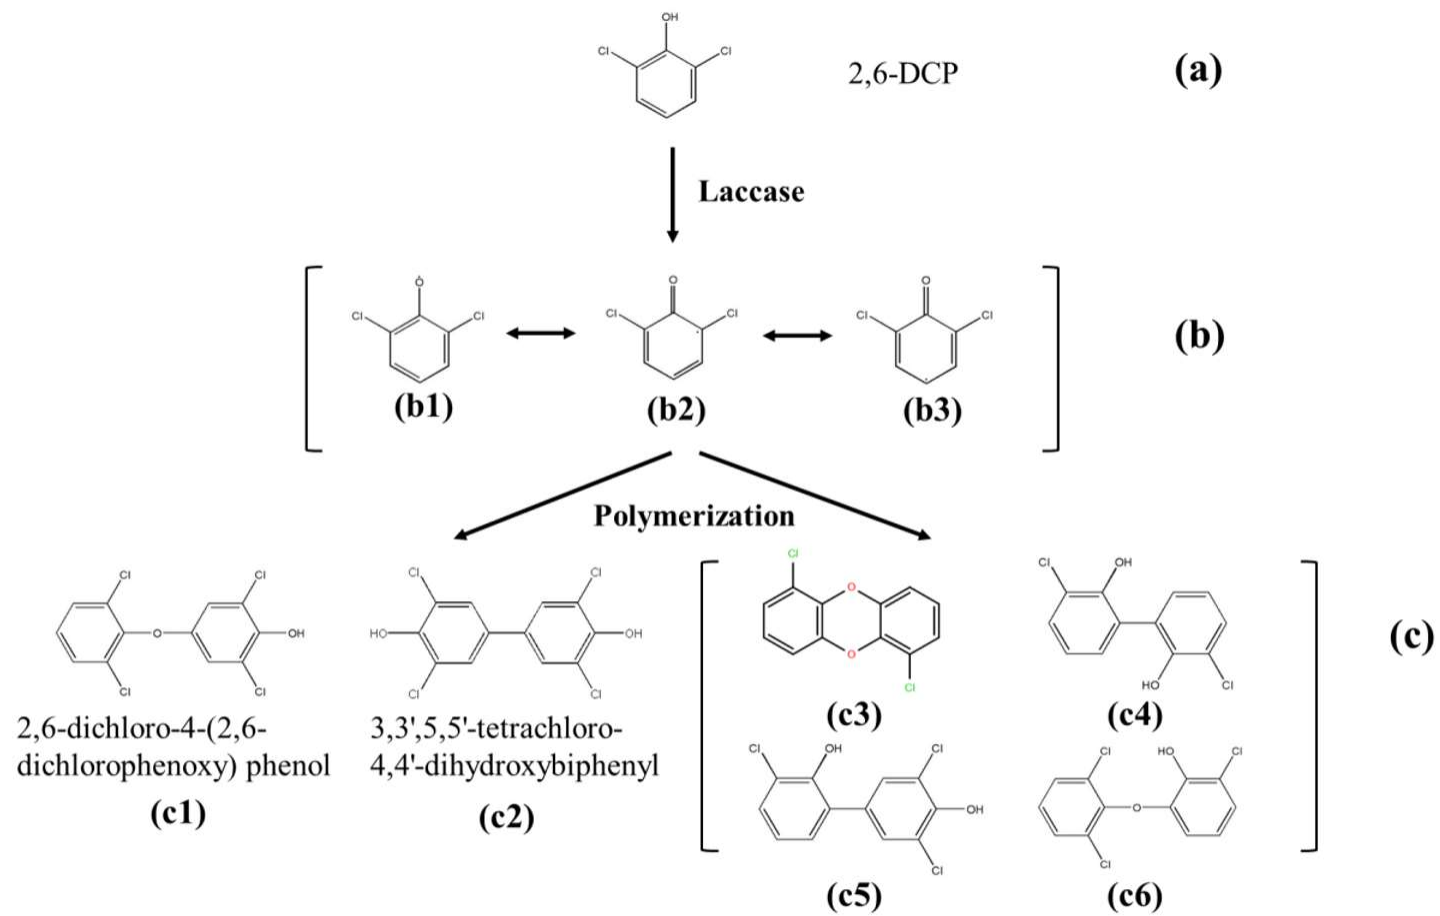

Supplement: s1 [file s1]

Fig.S3

**A**

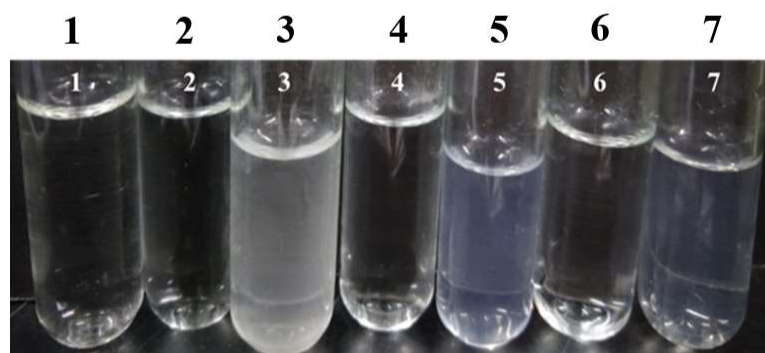

**B**

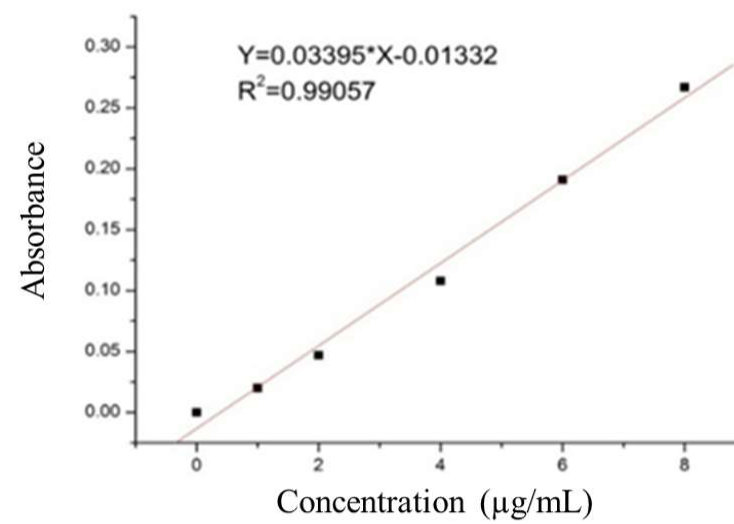

Supplement: s1 [file s1]
